# Supplementary material for: Features of 20 133 UK patients in hospital with covid-19 using the ISARIC WHO Clinical Characterisation Protocol: prospective observational cohort study
Source: PubMed Central journal article supplement (PMC7243036; doi:10.1136/bmj.m1985), 2020-05-22
Supplement: doca057402.ww1.pdf [file doca057402.ww1.pdf]

# Features of 20,133 hospitalised UK patients with COVID-19 using the ISARIC WHO Clinical Characterisation Protocol

AB Docherty, EM Harrison, CA Green, H Hardwick, R Pius, L Norman, KA Holden, JM Read, F Dondelinger, G Carson, L Merson, L Lee, D Plotkin, L Sigfrid, S Halpin, C Jackson, C Gamble, PW Horby, JS Nguyen-Van-Tam, ISARIC4C Investigators, J Dunning, PJM Openshaw, JK Baillie, MG Semple.

## Online supplement

### Introduction

ISARIC's aim is to facilitate real-time research on diseases caused by novel pathogens of public health concern in order to save lives and inform public health policy early on and during outbreaks[1]. Our open-access protocols use standardised and refined case report forms, information and consent documents, and offer a tiered biological sampling schedule. This enables aggregation between sites and studies and allows comparisons to be made between diverse locations and treatment strategies[2].

ISARIC's protocols were assigned Urgent Public Health Research Status by the National Institute for Health Research (NIHR), acknowledging that National Health Service (NHS) Hospitals in England and Wales and NIHR Clinical Research Network (CRN) resources would be necessary to prioritise their use in the event of activation. The ISARIC protocol gained approval across all acute hospital trusts in England and Wales in 2013.

The World Health Organisation (WHO) Ethics Review Committee approved a global master protocol for the ISARIC CCP (RPC571 & RPC572 WHO Research Ethics Review Committee, 25/04/2013) and endorsed its use in outbreaks of public health interest. The ISARIC CCP study is international and now includes low- and middle-income countries. The protocol is known globally as the ISARIC-WHO Clinical Characterisation Protocol for Severe Emerging Infection and, in the UK, the ISARIC CCP-UK.

### Methods

The clinical management of people with COVID-19 was not defined by the study.

Up to 10th March, test-positive symptomatic cases were admitted to hospital as part of a national containment strategy. Additionally, a small number of asymptomatic test-positive individuals were admitted to hospital; for example, asymptomatic travellers arriving in the UK who had been tested prior to departing countries that performed asymptomatic testing, with notification of UK authorities when the travellers arrived in the UK. After 10th March, admission was based on clinical need.

PHE published a case definition of COVID-19 on 13<sup>th</sup> March 2020 (PHE) at <https://www.gov.uk/government/publications/wuhan-novel-coronavirus-initial-investigation-of-possible-cases/investigation-and-initial-clinical-management-of-possible-cases-of-wuhan-novel-coronavirus-wn-cov-infection>

The clinical case definitions for hospital inpatients were clinical/radiological evidence of pneumonia or acute respiratory distress syndrome or influenza like illness (fever  $\geq 37.8^{\circ}\text{C}$  and at least one of the following respiratory symptoms, which must be of acute onset: persistent cough (with or without sputum), hoarseness, nasal discharge or congestion, shortness of breath, sore throat, wheezing, sneezing.

Around 23<sup>rd</sup> March, many hospitals included peripheral oxygen saturations (SpO<sub>2</sub>) of less than 93% as a threshold to inform admission decisions.

## Testing

The criteria to test for SARS-CoV-2 by PCR were not defined by the study; the decision to test was at the discretion of the clinician attending the patient. To support this, national guidance was provided by PHE and other UK public health agencies that advises who to test based on clinical case definitions for possible COVID-19, and also prioritisation of testing when demand exceeds capacity. In reality, anyone who was admitted to hospital and met the case definition for possible COVID-19 would have been tested, as capacity was never so limiting that hospital patients had to be triaged for testing.

## Variables

Age: Recorded as date of birth in consented Tier 1 and 2 patients, and age (years) in unconsented Tier 0 patients. We have categorised age into <50yrs, 50-69, 70-79 and >=80yrs for ease of clinical interpretation.

Sex: Categorised as sex at birth into Male vs Female

Comorbidities: as per Charlson Comorbidities Index. Obesity - clinician defined.

Day 1: Day of hospital admission for patients admitted with symptoms of COVID-19, and day that COVID-19 test was requested by clinicians for patients already admitted with alternative diagnosis

Critical Care: High Dependency or Intensive Care. Generally requiring additional organ support

Mortality: In-hospital mortality plus palliative discharge

## Bias

The research nurses were not formally screening all hospital admissions. We are therefore relatively unable to comment on the potential selection bias of our cohort. We are in the process of linking to routine administrative healthcare data and will be able to make comparisons at that point. Certain cohorts such as children and maternity, may be underrepresented.

## Study size

There was no formal power calculation for the study size. We report all patients recruited up to 19th April 2020, to allow 14 day outcomes to be described on 3<sup>rd</sup> of May, the date of data extraction.

## Results

Table E1. Presentation of COVID-19 in hospitalised patients. The denominator for each symptom excludes patients who were not specifically declared “No” or “Yes” indicated in column “N”.

|                           | N     |              | Male             | Female           | All              |
|---------------------------|-------|--------------|------------------|------------------|------------------|
| Total N (%)               |       |              | 12068 (59.9)     | 8065 (40.1)      | 20133            |
| Onset to admission (days) | 18406 | Median (IQR) | 5.0 (1.0 to 8.0) | 4.0 (1.0 to 7.0) | 4.0 (1.0 to 8.0) |
| Fever                     | 17452 | No           | 2817 (26.9)      | 2136 (30.6)      | 4953 (28.4)      |
|                           |       | Yes          | 7652 (73.1)      | 4847 (69.4)      | 12499 (71.6)     |
| Cough                     | 18730 | No           | 3378 (30.0)      | 2456 (32.9)      | 5834 (31.1)      |
|                           |       | Yes          | 7876 (70.0)      | 5020 (67.1)      | 12896 (68.9)     |
| Cough (sputum)            | 14413 | No           | 6317 (73.1)      | 4322 (74.8)      | 10639 (73.8)     |
|                           |       | Yes          | 2319 (26.9)      | 1455 (25.2)      | 3774 (26.2)      |
| Cough (blood)             | 14082 | No           | 8106 (96.0)      | 5486 (97.2)      | 13592 (96.5)     |
|                           |       | Yes          | 334 (4.0)        | 156 (2.8)        | 490 (3.5)        |
| Sore throat               | 13131 | No           | 7092 (90.4)      | 4758 (90.0)      | 11850 (90.2)     |
|                           |       | Yes          | 755 (9.6)        | 526 (10.0)       | 1281 (9.8)       |
| Runny nose                | 12838 | No           | 7403 (96.3)      | 4972 (96.5)      | 12375 (96.4)     |
|                           |       | Yes          | 284 (3.7)        | 179 (3.5)        | 463 (3.6)        |
| Ear pain                  | 12852 | No           | 7650 (99.5)      | 5124 (99.3)      | 12774 (99.4)     |
|                           |       | Yes          | 41 (0.5)         | 37 (0.7)         | 78 (0.6)         |
| Wheeze                    | 13952 | No           | 7503 (89.9)      | 4931 (88.0)      | 12434 (89.1)     |
|                           |       | Yes          | 846 (10.1)       | 672 (12.0)       | 1518 (10.9)      |
| Chest pain                | 14715 | No           | 7627 (86.2)      | 4942 (84.2)      | 12569 (85.4)     |
|                           |       | Yes          | 1221 (13.8)      | 925 (15.8)       | 2146 (14.6)      |
| Muscle ache               | 13403 | No           | 6397 (79.4)      | 4250 (79.6)      | 10647 (79.4)     |
|                           |       | Yes          | 1664 (20.6)      | 1092 (20.4)      | 2756 (20.6)      |
| Joint pain                | 12864 | No           | 7161 (92.8)      | 4742 (92.1)      | 11903 (92.5)     |
|                           |       | Yes          | 556 (7.2)        | 405 (7.9)        | 961 (7.5)        |

|                            |       |     |             |             |              |
|----------------------------|-------|-----|-------------|-------------|--------------|
| Fatigue                    | 14318 | No  | 4649 (54.1) | 3156 (55.2) | 7805 (54.5)  |
|                            |       | Yes | 3948 (45.9) | 2565 (44.8) | 6513 (45.5)  |
| Shortness of breath        | 16999 | No  | 2794 (27.4) | 2098 (30.9) | 4892 (28.8)  |
|                            |       | Yes | 7414 (72.6) | 4693 (69.1) | 12107 (71.2) |
| Lower chest wall indrawing | 12235 | No  | 7195 (98.3) | 4847 (98.7) | 12042 (98.4) |
|                            |       | Yes | 127 (1.7)   | 66 (1.3)    | 193 (1.6)    |
| Headache                   | 13325 | No  | 7066 (88.4) | 4599 (86.3) | 11665 (87.5) |
|                            |       | Yes | 930 (11.6)  | 730 (13.7)  | 1660 (12.5)  |
| Confusion                  | 15609 | No  | 6825 (72.7) | 4613 (74.1) | 11438 (73.3) |
|                            |       | Yes | 2558 (27.3) | 1613 (25.9) | 4171 (26.7)  |
| Seizures                   | 14702 | No  | 8670 (98.3) | 5783 (98.4) | 14453 (98.3) |
|                            |       | Yes | 153 (1.7)   | 96 (1.6)    | 249 (1.7)    |
| Abdominal pain             | 14616 | No  | 7957 (90.7) | 5174 (88.6) | 13131 (89.8) |
|                            |       | Yes | 819 (9.3)   | 666 (11.4)  | 1485 (10.2)  |
| Nausea/vomiting            | 15241 | No  | 7552 (82.7) | 4677 (76.5) | 12229 (80.2) |
|                            |       | Yes | 1577 (17.3) | 1435 (23.5) | 3012 (19.8)  |
| Diarrhoea                  | 15214 | No  | 7375 (80.7) | 4742 (78.0) | 12117 (79.6) |
|                            |       | Yes | 1760 (19.3) | 1337 (22.0) | 3097 (20.4)  |
| Conjunctivitis             | 13680 | No  | 8172 (99.6) | 5461 (99.7) | 13633 (99.7) |
|                            |       | Yes | 30 (0.4)    | 17 (0.3)    | 47 (0.3)     |
| Skin rash                  | 13994 | No  | 8250 (98.3) | 5512 (98.5) | 13762 (98.3) |
|                            |       | Yes | 146 (1.7)   | 86 (1.5)    | 232 (1.7)    |
| Skin ulcers                | 13951 | No  | 8201 (97.9) | 5419 (97.3) | 13620 (97.6) |
|                            |       | Yes | 179 (2.1)   | 152 (2.7)   | 331 (2.4)    |
| Lymphadenopathy            | 13711 | No  | 8173 (99.3) | 5447 (99.3) | 13620 (99.3) |
|                            |       | Yes | 55 (0.7)    | 36 (0.7)    | 91 (0.7)     |
| Bleeding (Haemorrhage)     | 14470 | No  | 8591 (98.8) | 5705 (98.9) | 14296 (98.8) |

|             |       |     |              |             |              |
|-------------|-------|-----|--------------|-------------|--------------|
|             |       | Yes | 108 (1.2)    | 66 (1.1)    | 174 (1.2)    |
| Any symptom | 19178 | No  | 477 (4.1)    | 378 (4.9)   | 855 (4.5)    |
|             |       | Yes | 11036 (95.9) | 7287 (95.1) | 18323 (95.5) |

Table E2. Current status stratified by age and sex. Table matches values in Figure 1.

| Sex at Birth | Age (y) | Discharged  | On-going care | Died        | All        |
|--------------|---------|-------------|---------------|-------------|------------|
| Male         | All     | 4711 (39.0) | 4088 (33.9)   | 3269 (27.1) | 12068      |
|              | 0-4     | 83 (73.5)   | 29 (25.7)     | 1 (0.9)     | 113 (100)  |
|              | 5-9     | 21 (80.8)   | 5 (19.2)      | 0 (0.0)     | 26 (100)   |
|              | 10-14   | 12 (54.5)   | 10 (45.5)     | 0 (0.0)     | 22 (100)   |
|              | 15-19   | 24 (80.0)   | 5 (16.7)      | 1 (3.3)     | 30 (100)   |
|              | 20-24   | 40 (74.1)   | 13 (24.1)     | 1 (1.9)     | 54 (100)   |
|              | 25-29   | 53 (62.4)   | 27 (31.8)     | 5 (5.9)     | 85 (100)   |
|              | 30-34   | 99 (69.2)   | 39 (27.3)     | 5 (3.5)     | 143 (100)  |
|              | 35-39   | 159 (66.0)  | 71 (29.5)     | 11 (4.6)    | 241 (100)  |
|              | 40-44   | 222 (64.0)  | 106 (30.5)    | 19 (5.5)    | 347 (100)  |
|              | 45-49   | 309 (57.1)  | 195 (36.0)    | 37 (6.8)    | 541 (100)  |
|              | 50-54   | 415 (54.2)  | 287 (37.5)    | 63 (8.2)    | 765 (100)  |
|              | 55-59   | 459 (47.7)  | 380 (39.5)    | 124 (12.9)  | 963 (100)  |
|              | 60-64   | 477 (46.6)  | 363 (35.4)    | 184 (18.0)  | 1024 (100) |
|              | 65-69   | 453 (41.5)  | 395 (36.2)    | 243 (22.3)  | 1091 (100) |
|              | 70-74   | 496 (34.8)  | 479 (33.6)    | 451 (31.6)  | 1426 (100) |
|              | 75-79   | 477 (30.9)  | 506 (32.7)    | 563 (36.4)  | 1546 (100) |
|              | 80-84   | 466 (28.8)  | 497 (30.8)    | 653 (40.4)  | 1616 (100) |
|              | 85-89   | 309 (24.2)  | 414 (32.5)    | 552 (43.3)  | 1275 (100) |
|              | 90+     | 137 (18.0)  | 267 (35.1)    | 356 (46.8)  | 760 (100)  |
| Female       | All     | 3488 (43.2) | 2681 (33.2)   | 1896 (23.5) | 8065       |

|  |       |            |            |            |            |
|--|-------|------------|------------|------------|------------|
|  | 0-4   | 60 (74.1)  | 20 (24.7)  | 1 (1.2)    | 81 (100)   |
|  | 5-9   | 10 (58.8)  | 7 (41.2)   | 0 (0.0)    | 17 (100)   |
|  | 10-14 | 11 (84.6)  | 2 (15.4)   | 0 (0.0)    | 13 (100)   |
|  | 15-19 | 25 (62.5)  | 14 (35.0)  | 1 (2.5)    | 40 (100)   |
|  | 20-24 | 39 (69.6)  | 16 (28.6)  | 1 (1.8)    | 56 (100)   |
|  | 25-29 | 104 (77.0) | 28 (20.7)  | 3 (2.2)    | 135 (100)  |
|  | 30-34 | 105 (67.3) | 49 (31.4)  | 2 (1.3)    | 156 (100)  |
|  | 35-39 | 119 (72.1) | 38 (23.0)  | 8 (4.8)    | 165 (100)  |
|  | 40-44 | 121 (62.4) | 65 (33.5)  | 8 (4.1)    | 194 (100)  |
|  | 45-49 | 227 (67.6) | 92 (27.4)  | 17 (5.1)   | 336 (100)  |
|  | 50-54 | 299 (62.2) | 145 (30.1) | 37 (7.7)   | 481 (100)  |
|  | 55-59 | 276 (55.3) | 173 (34.7) | 50 (10.0)  | 499 (100)  |
|  | 60-64 | 286 (49.1) | 210 (36.0) | 87 (14.9)  | 583 (100)  |
|  | 65-69 | 254 (42.5) | 196 (32.8) | 148 (24.7) | 598 (100)  |
|  | 70-74 | 316 (40.9) | 258 (33.4) | 198 (25.6) | 772 (100)  |
|  | 75-79 | 328 (34.6) | 326 (34.4) | 294 (31.0) | 948 (100)  |
|  | 80-84 | 375 (34.5) | 353 (32.5) | 358 (33.0) | 1086 (100) |
|  | 85-89 | 302 (29.2) | 379 (36.7) | 353 (34.1) | 1034 (100) |
|  | 90+   | 231 (26.5) | 310 (35.6) | 330 (37.9) | 871 (100)  |

Table E3. Current status by patient characteristics on admission.

|                                | N     |               | Died                | On-going care       | Discharged alive    | All                 |
|--------------------------------|-------|---------------|---------------------|---------------------|---------------------|---------------------|
| Total N (%)                    |       |               | 5165 (25.7)         | 6769 (33.6)         | 8199 (40.7)         | 20133               |
| Age on admission (years)       | 20133 | Median (IQR)  | 80.0 (71.0 to 86.0) | 72.2 (59.0 to 83.0) | 65.0 (51.0 to 78.0) | 72.9 (58.0 to 82.0) |
| Age (years)                    | 20133 | <18           | 2 (0.0)             | 84 (1.2)            | 224 (2.7)           | 310 (1.5)           |
|                                |       | 18-39         | 38 (0.7)            | 289 (4.3)           | 740 (9.0)           | 1067 (5.3)          |
|                                |       | 40-50         | 81 (1.6)            | 458 (6.8)           | 879 (10.7)          | 1418 (7.0)          |
|                                |       | 50-59         | 274 (5.3)           | 985 (14.6)          | 1449 (17.7)         | 2708 (13.5)         |
|                                |       | 60-69         | 662 (12.8)          | 1164 (17.2)         | 1470 (17.9)         | 3296 (16.4)         |
|                                |       | 70-79         | 1506 (29.2)         | 1569 (23.2)         | 1617 (19.7)         | 4692 (23.3)         |
|                                |       | 80+           | 2602 (50.4)         | 2220 (32.8)         | 1820 (22.2)         | 6642 (33.0)         |
| Any comorbidity                | 18525 | No            | 559 (11.5)          | 1201 (21.2)         | 2401 (30.1)         | 4161 (22.5)         |
|                                |       | Yes           | 4321 (88.5)         | 4476 (78.8)         | 5567 (69.9)         | 14364 (77.5)        |
| Chronic cardiac disease        | 17702 | No            | 2706 (57.9)         | 3643 (68.2)         | 5884 (76.6)         | 12233 (69.1)        |
|                                |       | Yes           | 1968 (42.1)         | 1699 (31.8)         | 1802 (23.4)         | 5469 (30.9)         |
| Chronic pulmonary disease      | 17634 | No            | 3530 (75.6)         | 4388 (82.6)         | 6588 (86.0)         | 14506 (82.3)        |
|                                |       | Yes           | 1137 (24.4)         | 922 (17.4)          | 1069 (14.0)         | 3128 (17.7)         |
| Asthma                         | 17535 | No            | 4041 (87.4)         | 4521 (85.8)         | 6433 (84.2)         | 14995 (85.5)        |
|                                |       | Yes           | 584 (12.6)          | 749 (14.2)          | 1207 (15.8)         | 2540 (14.5)         |
| Smoking                        | 14184 | Never Smoked  | 2105 (57.4)         | 2684 (64.9)         | 4179 (65.5)         | 8968 (63.2)         |
|                                |       | Former Smoker | 1350 (36.8)         | 1182 (28.6)         | 1832 (28.7)         | 4364 (30.8)         |
|                                |       | Yes           | 214 (5.8)           | 268 (6.5)           | 370 (5.8)           | 852 (6.0)           |
| Chronic kidney disease         | 17506 | No            | 3537 (76.5)         | 4389 (83.3)         | 6750 (88.7)         | 14676 (83.8)        |
|                                |       | Yes           | 1085 (23.5)         | 882 (16.7)          | 863 (11.3)          | 2830 (16.2)         |
| Diabetes without complications | 17599 | No            | 3568 (76.8)         | 4156 (78.2)         | 6225 (81.5)         | 13949 (79.3)        |
|                                |       | Yes           | 1080 (23.2)         | 1158 (21.8)         | 1412 (18.5)         | 3650 (20.7)         |

|                                    |       |     |             |             |             |              |
|------------------------------------|-------|-----|-------------|-------------|-------------|--------------|
| Diabetes with complications        | 17516 | No  | 4231 (91.6) | 4838 (91.9) | 7148 (93.7) | 16217 (92.6) |
|                                    |       | Yes | 389 (8.4)   | 429 (8.1)   | 481 (6.3)   | 1299 (7.4)   |
| Obesity                            | 16081 | No  | 3768 (90.0) | 4328 (89.1) | 6300 (89.5) | 14396 (89.5) |
|                                    |       | Yes | 417 (10.0)  | 531 (10.9)  | 737 (10.5)  | 1685 (10.5)  |
| Chronic neurological disorder      | 17382 | No  | 3917 (85.4) | 4586 (87.8) | 6908 (91.3) | 15411 (88.7) |
|                                    |       | Yes | 670 (14.6)  | 639 (12.2)  | 662 (8.7)   | 1971 (11.3)  |
| Dementia                           | 17459 | No  | 3626 (78.8) | 4458 (84.8) | 7015 (92.3) | 15099 (86.5) |
|                                    |       | Yes | 974 (21.2)  | 797 (15.2)  | 589 (7.7)   | 2360 (13.5)  |
| Malignancy                         | 17354 | No  | 3938 (86.5) | 4714 (90.1) | 6959 (92.0) | 15611 (90.0) |
|                                    |       | Yes | 617 (13.5)  | 519 (9.9)   | 607 (8.0)   | 1743 (10.0)  |
| Moderate/severe liver disease      | 17360 | No  | 4469 (97.7) | 5119 (98.2) | 7462 (98.5) | 17050 (98.2) |
|                                    |       | Yes | 105 (2.3)   | 92 (1.8)    | 113 (1.5)   | 310 (1.8)    |
| Mild Liver disease                 | 17331 | No  | 4490 (98.5) | 5131 (98.5) | 7429 (98.3) | 17050 (98.4) |
|                                    |       | Yes | 70 (1.5)    | 79 (1.5)    | 132 (1.7)   | 281 (1.6)    |
| Chronic hematologic disease        | 17328 | No  | 4290 (94.1) | 5033 (96.7) | 7312 (96.7) | 16635 (96.0) |
|                                    |       | Yes | 271 (5.9)   | 174 (3.3)   | 248 (3.3)   | 693 (4.0)    |
| Rheumatologic disorder             | 17289 | No  | 4019 (88.5) | 4701 (90.3) | 6873 (91.2) | 15593 (90.2) |
|                                    |       | Yes | 524 (11.5)  | 505 (9.7)   | 667 (8.8)   | 1696 (9.8)   |
| Malnutrition                       | 16695 | No  | 4177 (96.5) | 4906 (97.7) | 7216 (98.3) | 16299 (97.6) |
|                                    |       | Yes | 152 (3.5)   | 117 (2.3)   | 127 (1.7)   | 396 (2.4)    |
| Prior immunosuppressant medication | 18009 | Yes | 518 (10.9)  | 432 (8.0)   | 717 (9.1)   | 1667 (9.3)   |
|                                    |       | No  | 3974 (83.3) | 4610 (85.9) | 6787 (86.2) | 15371 (85.4) |
|                                    |       | N/A | 277 (5.8)   | 325 (6.1)   | 369 (4.7)   | 971 (5.4)    |
| Prior anti-infective medication    | 18017 | Yes | 948 (19.9)  | 934 (17.4)  | 1369 (17.4) | 3251 (18.0)  |
|                                    |       | No  | 3540 (74.3) | 4131 (76.9) | 6134 (77.8) | 13805 (76.6) |
|                                    |       | N/A | 278 (5.8)   | 306 (5.7)   | 377 (4.8)   | 961 (5.3)    |
| AIDS/HIV                           | 17251 | No  | 4506 (99.5) | 5170 (99.6) | 7492 (99.5) | 17168 (99.5) |



|  |  |     |          |          |          |          |
|--|--|-----|----------|----------|----------|----------|
|  |  | Yes | 23 (0.5) | 23 (0.4) | 37 (0.5) | 83 (0.5) |
|--|--|-----|----------|----------|----------|----------|

Table E4. Survival analysis. Cox Proportional Hazards analysis incorporating CCG/Health Board (geography) as a random effect (hierarchical multivariable). Discharged patients are not censored and held within the risk set (absorbing state/competing risks analysis). N = 15,194, N events = 3911. HR, hazard ratio. Results are hazard ratio (95% confidence interval, p-value) unless otherwise stated.

|                           |               | N (%)           | HR (univariable)                | HR (multivariable)             | HR (hierarchical multivariable) |
|---------------------------|---------------|-----------------|---------------------------------|--------------------------------|---------------------------------|
| Age on admission (years)  | <50           | 2778<br>(14.0)  | -                               | -                              | -                               |
|                           | 50-59         | 2693<br>(13.6)  | 2.55 (2.06-3.17,<br>p<0.001)    | 2.65 (2.08-3.38,<br>p<0.001)   | 2.63 (2.06-3.35,<br>p<0.001)    |
|                           | 60-69         | 3253<br>(16.4)  | 5.45 (4.48-6.63,<br>p<0.001)    | 5.01 (4.00-6.27,<br>p<0.001)   | 4.99 (3.99-6.25,<br>p<0.001)    |
|                           | 70-79         | 4624<br>(23.3)  | 9.76 (8.09-11.77,<br>p<0.001)   | 8.60 (6.92-10.67,<br>p<0.001)  | 8.51 (6.85-10.57,<br>p<0.001)   |
|                           | 80+           | 6524<br>(32.8)  | 13.47 (11.20-16.20,<br>p<0.001) | 11.44 (9.22-14.20,<br>p<0.001) | 11.09 (8.93-13.77,<br>p<0.001)  |
| Sex at Birth              | Male          | 11932<br>(60.0) | -                               | -                              | -                               |
|                           | Female        | 7940<br>(40.0)  | 0.85 (0.81-0.90,<br>p<0.001)    | 0.80 (0.75-0.86,<br>p<0.001)   | 0.81 (0.75-0.86,<br>p<0.001)    |
| Chronic cardiac disease   | No            | 12115<br>(69.2) | -                               | -                              | -                               |
|                           | Yes           | 5400<br>(30.8)  | 1.93 (1.82-2.04,<br>p<0.001)    | 1.16 (1.09-1.24,<br>p<0.001)   | 1.16 (1.08-1.24,<br>p<0.001)    |
| Chronic pulmonary disease | No            | 14369<br>(82.4) | -                               | -                              | -                               |
|                           | Yes           | 3079<br>(17.6)  | 1.68 (1.57-1.80,<br>p<0.001)    | 1.19 (1.10-1.29,<br>p<0.001)   | 1.17 (1.09-1.27,<br>p<0.001)    |
| Asthma                    | No            | 14844<br>(85.5) | -                               | -                              | -                               |
|                           | Yes           | 2510<br>(14.5)  | 0.80 (0.73-0.87,<br>p<0.001)    | -                              | -                               |
| Smoking                   | Never Smoked  | 8900<br>(63.3)  | -                               | -                              | -                               |
|                           | Yes           | 838 (6.0)       | 1.09 (0.95-1.26,<br>p=0.225)    | -                              | -                               |
|                           | Former Smoker | 4327<br>(30.8)  | 1.35 (1.26-1.45,<br>p<0.001)    | -                              | -                               |

|                               |     |                 |                              |                              |                              |
|-------------------------------|-----|-----------------|------------------------------|------------------------------|------------------------------|
| Chronic kidney disease        | No  | 14527<br>(83.9) | -                            | -                            | -                            |
|                               | Yes | 2792<br>(16.1)  | 1.92 (1.79-2.05,<br>p<0.001) | 1.26 (1.16-1.36,<br>p<0.001) | 1.28 (1.18-1.39,<br>p<0.001) |
| Diabetes                      | No  | 12690<br>(72.4) | -                            | -                            | -                            |
|                               | Yes | 4849<br>(27.6)  | 1.27 (1.20-1.35,<br>p<0.001) | 1.06 (0.99-1.14,<br>p=0.089) | 1.06 (0.99-1.14,<br>p=0.087) |
| Obesity                       | No  | 14249<br>(89.5) | -                            | -                            | -                            |
|                               | Yes | 1671<br>(10.5)  | 0.91 (0.82-1.01,<br>p=0.077) | 1.32 (1.19-1.48,<br>p<0.001) | 1.33 (1.19-1.49,<br>p<0.001) |
| Chronic neurological disorder | No  | 15257<br>(88.7) | -                            | -                            | -                            |
|                               | Yes | 1947<br>(11.3)  | 1.54 (1.42-1.68,<br>p<0.001) | 1.19 (1.08-1.30,<br>p<0.001) | 1.17 (1.06-1.29,<br>p=0.001) |
| Dementia                      | No  | 14940<br>(86.5) | -                            | -                            | -                            |
|                               | Yes | 2336<br>(13.5)  | 2.32 (2.16-2.49,<br>p<0.001) | 1.39 (1.28-1.51,<br>p<0.001) | 1.40 (1.28-1.52,<br>p<0.001) |
| Malignancy                    | No  | 15461<br>(90.0) | -                            | -                            | -                            |
|                               | Yes | 1712<br>(10.0)  | 1.56 (1.44-1.70,<br>p<0.001) | 1.14 (1.03-1.25,<br>p=0.008) | 1.13 (1.02-1.24,<br>p=0.017) |
| Moderate/severe liver disease | No  | 16873<br>(98.2) | -                            | -                            | -                            |
|                               | Yes | 306 (1.8)       | 1.43 (1.18-1.74,<br>p<0.001) | 1.54 (1.23-1.92,<br>p<0.001) | 1.51 (1.21-1.88,<br>p<0.001) |
| Mild Liver disease            | No  | 16869<br>(98.4) | -                            | -                            | -                            |
|                               | Yes | 280 (1.6)       | 0.91 (0.72-1.16,<br>p=0.458) | -                            | -                            |
| Chronic hematologic disease   | No  | 16465<br>(96.0) | -                            | -                            | -                            |
|                               | Yes | 686 (4.0)       | 1.64 (1.45-1.85,<br>p<0.001) | -                            | -                            |
| Rheumatologic disorder        | No  | 15435<br>(90.2) | -                            | -                            | -                            |

|                                       |     |                 |                              |   |   |
|---------------------------------------|-----|-----------------|------------------------------|---|---|
|                                       | Yes | 1671<br>(9.8)   | 1.24 (1.14-1.36,<br>p<0.001) | - | - |
| Malnutrition                          | No  | 16128<br>(97.6) | -                            | - | - |
|                                       | Yes | 392 (2.4)       | 1.71 (1.46-2.02,<br>p<0.001) | - | - |
| Prior immunosuppressant<br>medication | No  | 15224<br>(90.3) | -                            | - | - |
|                                       | Yes | 1644<br>(9.7)   | 1.18 (1.08-1.30,<br>p<0.001) | - | - |
| Prior anti-infective<br>medication    | No  | 13662<br>(80.9) | -                            | - | - |
|                                       | Yes | 3222<br>(19.1)  | 1.12 (1.04-1.21,<br>p=0.002) | - | - |
| AIDS/HIV                              | No  | 16989<br>(99.5) | -                            | - | - |
|                                       | Yes | 83 (0.5)        | 0.98 (0.65-1.48,<br>p=0.921) | - | - |

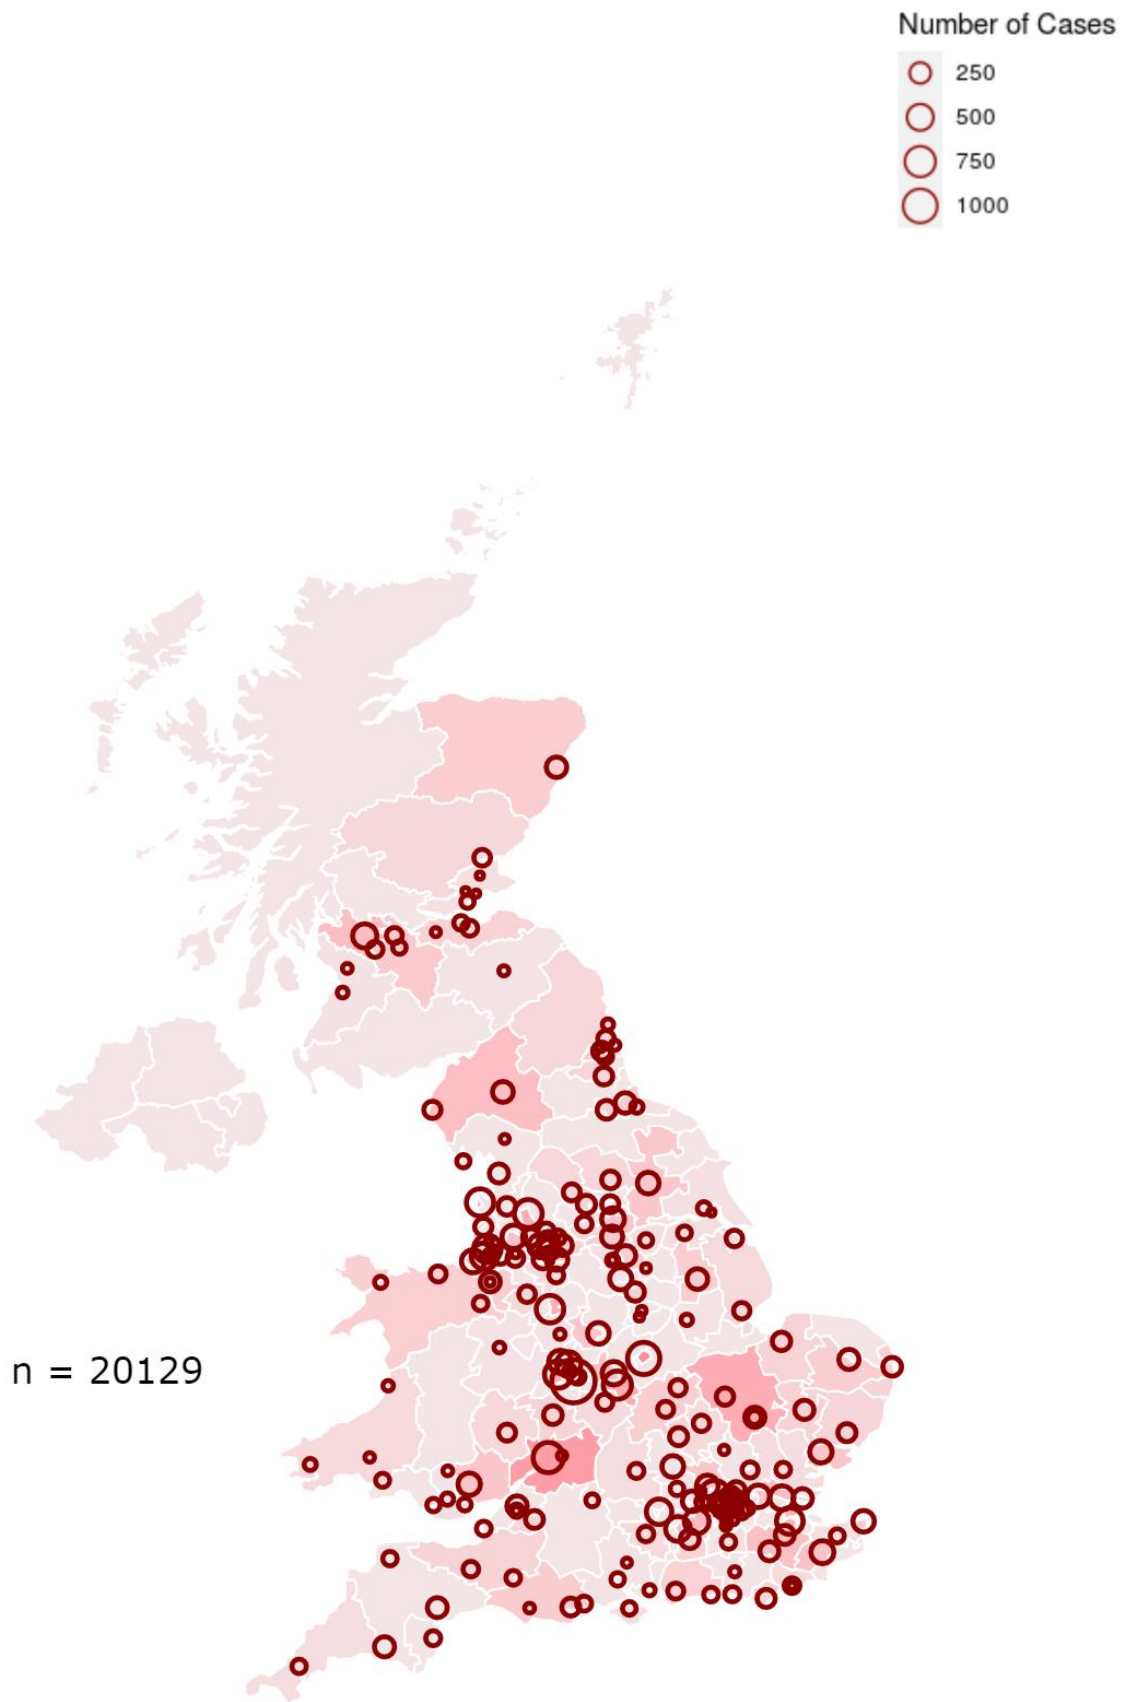

Figure E1: Geographical distribution of patients recruited to ISARIC CCP-UK

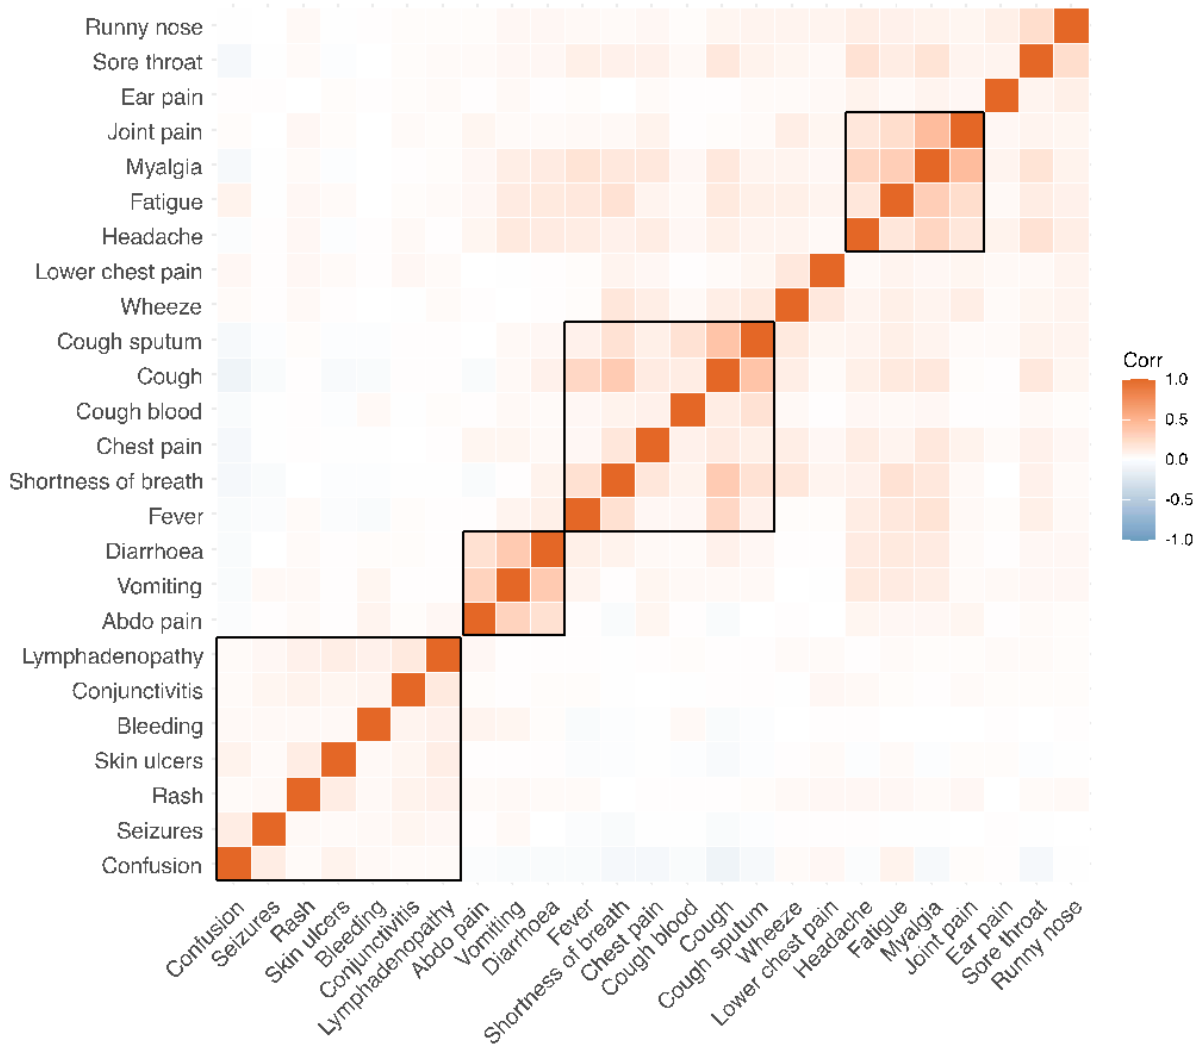

Figure E2. Correlation matrix of symptoms on admission to hospital.

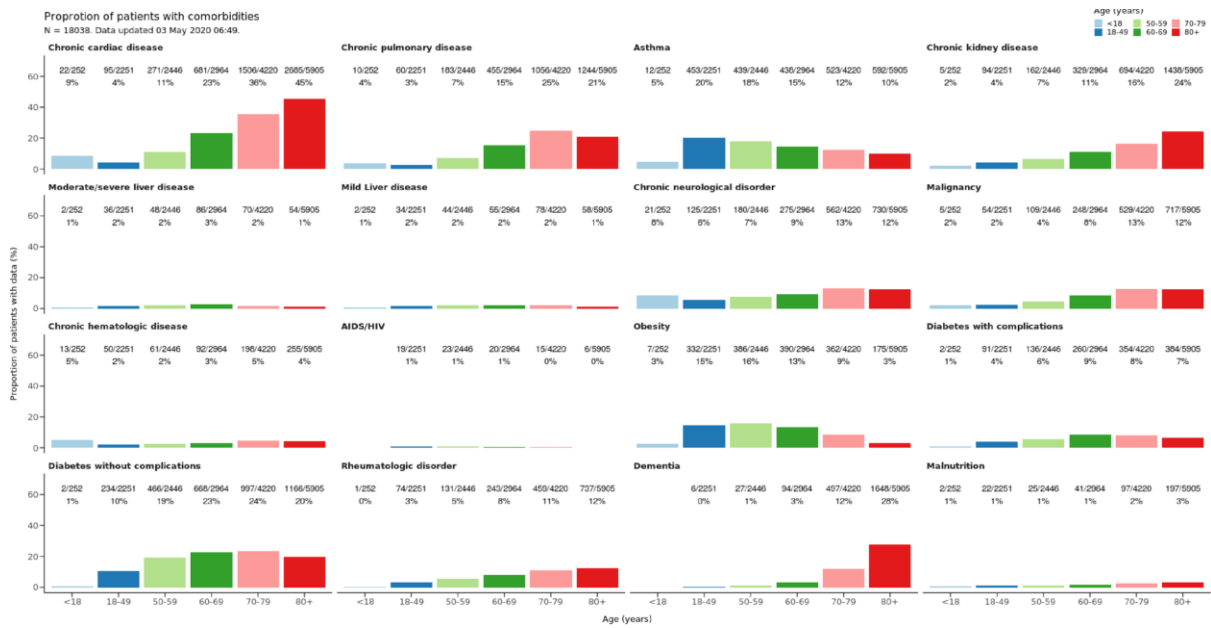

Figure E3. Pattern of comorbidity stratified by age.

Length of stay stratified by age and mortality  
 Proportion who reach outcome by day 14 shown

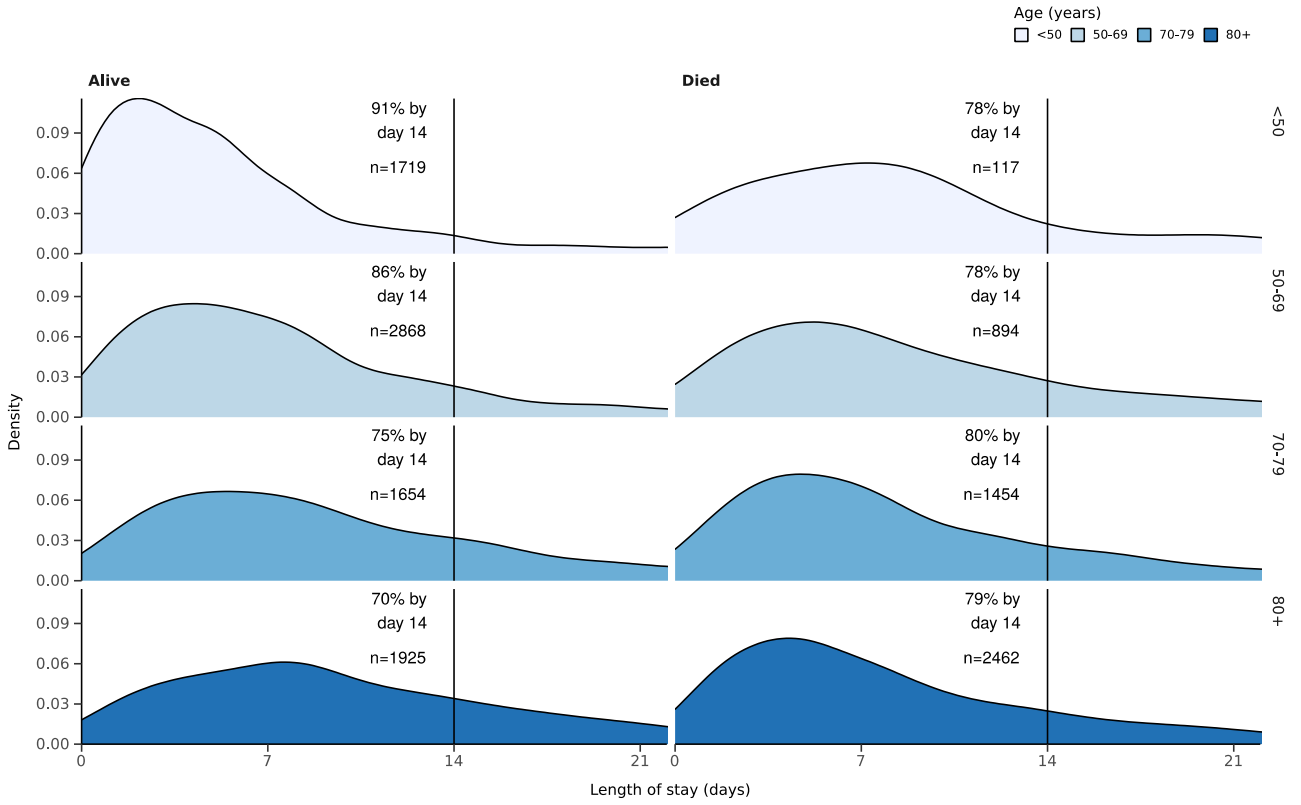

Figure E4. Length of stay stratified by age and mortality.



Table E5. Text box to enable comparison with studies from different locations and health systems

*-What were the criteria for testing for COVID-19, what tests were in use and what was their accuracy, and what if any were the criteria used to diagnose COVID-19?*

COVID-19 was diagnosed on viral PCR from nose/throat swab or deep respiratory sampling (endotracheal aspirate or broncho-alveolar lavage),

*-Was any rationing in place or were there shortages of staff, beds (especially ICU beds), ventilators, dialysis equipment, etc?*

There was no rationing of ICU beds or equipment during this time

*- What were criteria for hospital and ICU admission at the time (a general description is fine but if explicit criteria were used please report them)? In particular, please note if certain groups of patients were managed as outpatients rather than being admitted.*

There were no explicit criteria for hospital admission after the initial contact tracing and isolation policy ceased on 10<sup>th</sup> March 2020. Patients admitted to hospital were at the discretion of the assessing clinician.

*- What were criteria for intubation and extubation?*

In the absence of reliable evidence, opinion has varied considerably between individual ICU clinicians, and units across the country, so that there were no explicit criteria for intubation or extubation.

Table E6: Case definition for COVID-19, “criteria” and “priorities” for testing, by change over time.

| Case definition                                                                                                                                                                                                                                                                                                                                                                                                                                                                                                                                                                                                                                                                                                                                                                                                                                                                       | “Criteria for testing” from 10 <sup>th</sup> January 2020, and “Priorities for testing” from 27 March.                                                                                                                                                                                                                                                                                                                                                                                                                                                                  | Date published |
|---------------------------------------------------------------------------------------------------------------------------------------------------------------------------------------------------------------------------------------------------------------------------------------------------------------------------------------------------------------------------------------------------------------------------------------------------------------------------------------------------------------------------------------------------------------------------------------------------------------------------------------------------------------------------------------------------------------------------------------------------------------------------------------------------------------------------------------------------------------------------------------|-------------------------------------------------------------------------------------------------------------------------------------------------------------------------------------------------------------------------------------------------------------------------------------------------------------------------------------------------------------------------------------------------------------------------------------------------------------------------------------------------------------------------------------------------------------------------|----------------|
| <p>Interim definition: possible cases<br/>If the patient satisfies epidemiological and clinical criteria, they are classified as a possible case.</p> <p>Epidemiological criteria</p> <ul style="list-style-type: none"> <li>• travel to Wuhan City in the 14 days before the onset of illness, <b>or</b></li> <li>• contact (see definition below) with confirmed cases of WN-CoV</li> </ul> <p>Clinical criteria</p> <ul style="list-style-type: none"> <li>• severe acute respiratory infection requiring admission to hospital with clinical or radiological evidence of pneumonia or acute respiratory distress syndrome, <b>or</b></li> <li>• fever or history of fever (<math>\geq 38^{\circ}\text{C}</math>) and acute respiratory infection (sudden onset of respiratory infection with at least one of: shortness of breath, cough or sore throat)</li> </ul>               | <p>For the purposes of testing, contact with a case is defined as:</p> <ul style="list-style-type: none"> <li>• living in the same household</li> </ul> <p>OR</p> <ul style="list-style-type: none"> <li>• direct contact with the case or their body fluids or their laboratory specimens without recommended PPE, or in the same room of a healthcare setting when an aerosol generating procedure is undertaken on the case without recommended PPE</li> <li>• within 2 metres of the case in any other setting not listed above, for any length of time.</li> </ul> | 10/1/20        |
| <p>Epidemiological criteria<br/>In the 14 days before the onset of illness:</p> <ul style="list-style-type: none"> <li>• travel to Wuhan, Hubei Province, China</li> </ul> <p>OR</p> <ul style="list-style-type: none"> <li>• contact (see definition below) with confirmed cases of WN-CoV</li> </ul> <p>Clinical criteria</p> <ul style="list-style-type: none"> <li>• severe acute respiratory infection requiring admission to hospital with clinical or radiological evidence of pneumonia or acute respiratory distress syndrome</li> </ul> <p>OR</p> <ul style="list-style-type: none"> <li>• acute respiratory infection of any degree of severity (including at least one of: shortness of breath, cough or sore throat)</li> </ul> <p>Clinicians should be alert to the possibility of atypical presentations in patients who are immunocompromised.</p>                    | <p>For the purposes of testing, contact with a case is defined as:</p> <ul style="list-style-type: none"> <li>• living in the same household</li> </ul> <p>OR</p> <ul style="list-style-type: none"> <li>• direct contact with the case or their body fluids or their laboratory specimens, or in the same room of a healthcare setting when an aerosol generating procedure is undertaken on the case</li> <li>• within 2 metres of the case in any other setting not listed above, for any length of time</li> </ul>                                                  | 16/1/20        |
| <p>Epidemiological criteria<br/>In the 14 days before the onset of illness:</p> <ul style="list-style-type: none"> <li>• travel to mainland China (not including Hong Kong and Macao)</li> </ul> <p>OR</p> <ul style="list-style-type: none"> <li>• contact (see definition below) with confirmed cases of 2019-nCoV</li> </ul> <p>Clinical criteria</p> <ul style="list-style-type: none"> <li>• severe acute respiratory infection requiring admission to hospital with clinical or radiological evidence of pneumonia or acute respiratory distress syndrome</li> </ul> <p>OR</p> <ul style="list-style-type: none"> <li>• acute respiratory infection of any degree of severity (including at least one of: fever, shortness of breath or cough)</li> </ul> <p>Clinicians should be alert to the possibility of atypical presentations in patients who are immunocompromised.</p> | <p>For the purposes of testing, contact with a case is defined as:</p> <ul style="list-style-type: none"> <li>• living in the same household</li> </ul> <p>OR</p> <ul style="list-style-type: none"> <li>• direct contact with the case or their body fluids or their laboratory specimens, or in the same room of a healthcare setting when an aerosol generating procedure is undertaken on the case</li> <li>• within 2 metres of the case in any other setting not listed above, for any length of time</li> </ul>                                                  | 3/2/20         |

|                                                                                                                                                                                                                                                                                                                                                                                                                                                                                                                                                                                                                                                                                                                                                                                                                                                                                                                                                                                                                                                                            |                                                                                                                                                                                                                                                                                                                                                                                                                                                                                                                                                                                                                                                                                                                                                                                                                                                                                        |               |
|----------------------------------------------------------------------------------------------------------------------------------------------------------------------------------------------------------------------------------------------------------------------------------------------------------------------------------------------------------------------------------------------------------------------------------------------------------------------------------------------------------------------------------------------------------------------------------------------------------------------------------------------------------------------------------------------------------------------------------------------------------------------------------------------------------------------------------------------------------------------------------------------------------------------------------------------------------------------------------------------------------------------------------------------------------------------------|----------------------------------------------------------------------------------------------------------------------------------------------------------------------------------------------------------------------------------------------------------------------------------------------------------------------------------------------------------------------------------------------------------------------------------------------------------------------------------------------------------------------------------------------------------------------------------------------------------------------------------------------------------------------------------------------------------------------------------------------------------------------------------------------------------------------------------------------------------------------------------------|---------------|
| <p>Epidemiological criteria<br/>In the 14 days before the onset of illness:</p> <ul style="list-style-type: none"> <li>• travel to China, Hong Kong, Japan, Macau, Malaysia, Republic of Korea, Singapore, Taiwan, or Thailand</li> </ul> <p>OR</p> <ul style="list-style-type: none"> <li>• contact (see definition below) with confirmed cases of 2019-nCoV</li> </ul> <p>Clinical criteria</p> <ul style="list-style-type: none"> <li>• severe acute respiratory infection requiring admission to hospital with clinical or radiological evidence of pneumonia or acute respiratory distress syndrome</li> </ul> <p>OR</p> <ul style="list-style-type: none"> <li>• acute respiratory infection of any degree of severity, including at least one of shortness of breath or cough (with or without fever)</li> </ul> <p>OR</p> <ul style="list-style-type: none"> <li>• fever with no other symptoms</li> </ul> <p>Clinicians should be alert to the possibility of atypical presentations in patients who are immunocompromised.</p>                                   | <p>For the purposes of testing, contact with a case is defined as:</p> <ul style="list-style-type: none"> <li>• living in the same household</li> </ul> <p>OR</p> <ul style="list-style-type: none"> <li>• direct contact with the case or their body fluids or their laboratory specimens, or in the same room of a healthcare setting when an aerosol generating procedure is undertaken on the case</li> </ul> <p>OR</p> <ul style="list-style-type: none"> <li>• direct or face to face contact with a case, for any length of time</li> </ul> <p>OR</p> <ul style="list-style-type: none"> <li>• being within 2 metres of the case for any other exposure not listed above, for longer than 15 minutes</li> </ul> <p>OR</p> <ul style="list-style-type: none"> <li>• being otherwise advised by a public health agency that contact with a confirmed case has occurred</li> </ul> | <p>6/2/20</p> |
| <p>Epidemiological criteria<br/>In the 14 days before the onset of illness:</p> <ul style="list-style-type: none"> <li>• travel to China, Hong Kong, Japan, Macau, Malaysia, Republic of Korea, Singapore, Taiwan, or Thailand</li> </ul> <p>OR</p> <ul style="list-style-type: none"> <li>• contact (see definition below) with confirmed cases of 2019-nCoV</li> </ul> <p>Clinical criteria</p> <ul style="list-style-type: none"> <li>• severe acute respiratory infection requiring admission to hospital with clinical or radiological evidence of pneumonia or acute respiratory distress syndrome</li> </ul> <p>OR</p> <ul style="list-style-type: none"> <li>• acute respiratory infection of any degree of severity, including at least one of shortness of breath (difficult breathing in children) or cough (with or without fever)</li> </ul> <p>OR</p> <ul style="list-style-type: none"> <li>• fever with no other symptoms</li> </ul> <p>Clinicians should be alert to the possibility of atypical presentations in patients who are immunocompromised.</p> | <p>For the purposes of testing, contact with a case is defined as:</p> <ul style="list-style-type: none"> <li>• living in the same household</li> </ul> <p>OR</p> <ul style="list-style-type: none"> <li>• direct contact with the case or their body fluids or their laboratory specimens, or in the same room of a healthcare setting when an aerosol generating procedure is undertaken on the case</li> </ul> <p>OR</p> <ul style="list-style-type: none"> <li>• direct or face to face contact with a case, for any length of time</li> </ul> <p>OR</p> <ul style="list-style-type: none"> <li>• being within 2 metres of the case for any other exposure not listed above, for longer than 15 minutes</li> </ul> <p>OR</p> <ul style="list-style-type: none"> <li>• being otherwise advised by a public health agency that contact with a confirmed case has occurred</li> </ul> | <p>9/2/20</p> |

|                                                                                                                                                                                                                                                                                                                                                                                                                                                                                                                                                                                                                                                                                                                                                                                                                                                                                                                                                                                                                                                                                                                                                                                                                                                                                            |                                                                                                                                                                                                                                                                                                                                                                                                                                                                                                                                                                                                                                                                                                                                                                                                                                                                                                                |                |
|--------------------------------------------------------------------------------------------------------------------------------------------------------------------------------------------------------------------------------------------------------------------------------------------------------------------------------------------------------------------------------------------------------------------------------------------------------------------------------------------------------------------------------------------------------------------------------------------------------------------------------------------------------------------------------------------------------------------------------------------------------------------------------------------------------------------------------------------------------------------------------------------------------------------------------------------------------------------------------------------------------------------------------------------------------------------------------------------------------------------------------------------------------------------------------------------------------------------------------------------------------------------------------------------|----------------------------------------------------------------------------------------------------------------------------------------------------------------------------------------------------------------------------------------------------------------------------------------------------------------------------------------------------------------------------------------------------------------------------------------------------------------------------------------------------------------------------------------------------------------------------------------------------------------------------------------------------------------------------------------------------------------------------------------------------------------------------------------------------------------------------------------------------------------------------------------------------------------|----------------|
| <p>Epidemiological criteria<br/>Please note these criteria changed on 7 February 2020, and should be applied prospectively only to those being assessed after this date.<br/>In the 14 days before the onset of illness:</p> <ul style="list-style-type: none"> <li>• travel to China, Hong Kong, Japan, Macau, Malaysia, Republic of Korea, Singapore, Taiwan, or Thailand. This includes transit, for any length of time, in these countries</li> </ul> <p>OR</p> <ul style="list-style-type: none"> <li>• contact (see definition below) with confirmed cases of 2019-nCoV</li> </ul> <p>Clinical criteria</p> <ul style="list-style-type: none"> <li>• severe acute respiratory infection requiring admission to hospital with clinical or radiological evidence of pneumonia or acute respiratory distress syndrome</li> </ul> <p>OR</p> <ul style="list-style-type: none"> <li>• acute respiratory infection of any degree of severity, including at least one of shortness of breath (difficult breathing in children) or cough (with or without fever)</li> </ul> <p>OR</p> <ul style="list-style-type: none"> <li>• fever with no other symptoms</li> </ul> <p>Clinicians should be alert to the possibility of atypical presentations in patients who are immunocompromised.</p> | <p>For the purposes of testing, contact with a case is defined as:</p> <ul style="list-style-type: none"> <li>• living in the same household</li> </ul> <p>OR</p> <ul style="list-style-type: none"> <li>• direct contact with the case or their body fluids or their laboratory specimens, or in the same room of a healthcare setting when an aerosol generating procedure is undertaken on the case without appropriate PPE</li> </ul> <p>OR</p> <ul style="list-style-type: none"> <li>• direct or face to face contact with a case, for any length of time</li> </ul> <p>OR</p> <ul style="list-style-type: none"> <li>• being within 2 metres of the case for any other exposure not listed above, for longer than 15 minutes</li> </ul> <p>OR</p> <ul style="list-style-type: none"> <li>• being otherwise advised by a public health agency that contact with a confirmed case has occurred</li> </ul> | <p>11/2/20</p> |
| <p>Epidemiological criteria<br/>Please note these criteria changed on 25 February 2020, and should be applied retrospectively from 19 February.</p> <p>In the 14 days before the onset of illness:</p> <ul style="list-style-type: none"> <li>• travel to specified countries and areas. This includes transit, for any length of time, in these countries</li> </ul> <p>OR</p> <ul style="list-style-type: none"> <li>• contact (see definition below) with confirmed cases of COVID-19</li> </ul> <p>Clinical criteria</p> <ul style="list-style-type: none"> <li>• severe acute respiratory infection requiring admission to hospital with clinical or radiological evidence of pneumonia or acute respiratory distress syndrome</li> </ul> <p>OR</p> <ul style="list-style-type: none"> <li>• acute respiratory infection of any degree of severity, including at least one of shortness of breath (difficult breathing in children) or cough (with or without fever)</li> </ul> <p>OR</p> <ul style="list-style-type: none"> <li>• fever with no other symptoms</li> </ul>                                                                                                                                                                                                            | <p>Not changed</p>                                                                                                                                                                                                                                                                                                                                                                                                                                                                                                                                                                                                                                                                                                                                                                                                                                                                                             | <p>25/2/20</p> |

|                                                                                                                                                                                                                                                                                                                                                                                                                                                                                                                                                                                                                                                                                                                                                                                                                                                                                                                                                                                                                                                                                                                                                                                                                                                                                                                                                                                                                                                                                                                               |                                                                                                                                                                                                                                                                                                                                                                                                                                                                                                                                                                                                                                                                                                                                                                                                                                                                                                                                                                                                                                                       |                |
|-------------------------------------------------------------------------------------------------------------------------------------------------------------------------------------------------------------------------------------------------------------------------------------------------------------------------------------------------------------------------------------------------------------------------------------------------------------------------------------------------------------------------------------------------------------------------------------------------------------------------------------------------------------------------------------------------------------------------------------------------------------------------------------------------------------------------------------------------------------------------------------------------------------------------------------------------------------------------------------------------------------------------------------------------------------------------------------------------------------------------------------------------------------------------------------------------------------------------------------------------------------------------------------------------------------------------------------------------------------------------------------------------------------------------------------------------------------------------------------------------------------------------------|-------------------------------------------------------------------------------------------------------------------------------------------------------------------------------------------------------------------------------------------------------------------------------------------------------------------------------------------------------------------------------------------------------------------------------------------------------------------------------------------------------------------------------------------------------------------------------------------------------------------------------------------------------------------------------------------------------------------------------------------------------------------------------------------------------------------------------------------------------------------------------------------------------------------------------------------------------------------------------------------------------------------------------------------------------|----------------|
| <p>Case definitions: possible case, as of 10 March 2020</p> <p>2.1 Patients who meet the following criteria, regardless of epidemiological links</p> <ul style="list-style-type: none"> <li>• requiring admission to hospital and</li> <li>• have either clinical or radiological evidence of pneumonia</li> </ul> <p>or</p> <ul style="list-style-type: none"> <li>• acute respiratory distress syndrome</li> </ul> <p>or</p> <ul style="list-style-type: none"> <li>• influenza like illness</li> </ul> <p>2.2 Patients who meet both epidemiological and clinical case criteria, either well enough to remain in the community or who get admitted to hospital</p> <p>Epidemiological criteria</p> <p>In the 14 days before the onset of illness:</p> <ul style="list-style-type: none"> <li>• travel to specified countries and areas, including transit for any length of time in these countries or areas</li> </ul> <p>or</p> <ul style="list-style-type: none"> <li>• contact (see definition below) with confirmed cases of COVID-19</li> </ul> <p>Clinical criteria</p> <ul style="list-style-type: none"> <li>• acute respiratory infection of any degree of severity, including at least one of shortness of breath (difficult breathing in children) or cough (with or without fever)</li> </ul> <p>or</p> <ul style="list-style-type: none"> <li>• fever with no other symptoms</li> </ul> <p>Clinicians should be alert to the possibility of atypical presentations in patients who are immunocompromised</p> | <p>Not changed</p>                                                                                                                                                                                                                                                                                                                                                                                                                                                                                                                                                                                                                                                                                                                                                                                                                                                                                                                                                                                                                                    | <p>10/3/20</p> |
| <p>Case definitions: possible case, as of 13 March 2020</p> <p>2.1 Patients who meet the following criteria (inpatient definition)</p> <ul style="list-style-type: none"> <li>• requiring admission to hospital (a hospital practitioner has decided that admission to hospital is required with an expectation that the patient will need to stay at least one night)</li> </ul> <p>and</p> <ul style="list-style-type: none"> <li>• have either clinical or radiological evidence of pneumonia</li> </ul> <p>or</p> <ul style="list-style-type: none"> <li>• acute respiratory distress syndrome</li> </ul> <p>or</p> <ul style="list-style-type: none"> <li>• influenza like illness (fever <math>\geq 37.8^{\circ}\text{C}</math> and at least one of the following respiratory symptoms, which must be of acute onset: persistent cough (with or without sputum), hoarseness, nasal discharge or congestion, shortness of breath, sore throat, wheezing, sneezing)</li> </ul> <p>2.2 Patients who meet the following criteria and are well enough to remain in the community</p> <ul style="list-style-type: none"> <li>• new continuous cough and/or</li> <li>• high temperature</li> </ul> <p>Individuals with cough or fever should now stay at home</p>                                                                                                                                                                                                                                                              | <p>Replaced with page 'priority for testing during periods of significant demand'.</p> <p>Group 1 (test first): patient requiring critical care for the management of pneumonia, ARDS or influenza like illness (ILI)†, or an alternative indication of severe illness has been provided e.g. severe pneumonia or ARDS</p> <p>Group 2: all other patients requiring admission to hospital* for management of pneumonia, ARDS or ILI</p> <p>Group 3: clusters of disease in residential or care settings e.g. long term care facility, prisons, boarding schools</p> <p>† ILI: fever <math>\geq 37.8^{\circ}\text{C}</math> and at least one of the following respiratory symptoms, which must be of acute onset: persistent cough (with or without sputum), hoarseness, nasal discharge or congestion, shortness of breath, sore throat, wheezing, sneezing)</p> <p>* admission to hospital: a hospital practitioner has decided that admission to hospital is required with an expectation that the patient will need to stay at least one night</p> | <p>13/3/20</p> |

|                                                                                                                                                                                                                                                                                                                                                                                                                                                                                                                                                                                                                                                                                                                                                                                                                                                                                                                                                                                                                                                                                                                                                                                                                                                                                                                                                                                                                                                                                                                                                                                                                                                              |                                                                                                                                                                                                                                                                                                                                                                                                                                                                                                                                                                                                                                                                                                                                                                                                                                                     |                |
|--------------------------------------------------------------------------------------------------------------------------------------------------------------------------------------------------------------------------------------------------------------------------------------------------------------------------------------------------------------------------------------------------------------------------------------------------------------------------------------------------------------------------------------------------------------------------------------------------------------------------------------------------------------------------------------------------------------------------------------------------------------------------------------------------------------------------------------------------------------------------------------------------------------------------------------------------------------------------------------------------------------------------------------------------------------------------------------------------------------------------------------------------------------------------------------------------------------------------------------------------------------------------------------------------------------------------------------------------------------------------------------------------------------------------------------------------------------------------------------------------------------------------------------------------------------------------------------------------------------------------------------------------------------|-----------------------------------------------------------------------------------------------------------------------------------------------------------------------------------------------------------------------------------------------------------------------------------------------------------------------------------------------------------------------------------------------------------------------------------------------------------------------------------------------------------------------------------------------------------------------------------------------------------------------------------------------------------------------------------------------------------------------------------------------------------------------------------------------------------------------------------------------------|----------------|
| <p>Clinicians should be alert to the possibility of atypical presentations in patients who are immunocompromised.<br/>Alternative clinical diagnoses and epidemiological risk factors should be considered</p>                                                                                                                                                                                                                                                                                                                                                                                                                                                                                                                                                                                                                                                                                                                                                                                                                                                                                                                                                                                                                                                                                                                                                                                                                                                                                                                                                                                                                                               |                                                                                                                                                                                                                                                                                                                                                                                                                                                                                                                                                                                                                                                                                                                                                                                                                                                     |                |
| <p>Case definitions: possible case, as of 13 March 2020</p> <p>2.1 Patients who meet the following criteria (inpatient definition)</p> <ul style="list-style-type: none"> <li>• requiring admission to hospital (a hospital practitioner has decided that admission to hospital is required with an expectation that the patient will need to stay at least one night)</li> </ul> <p>and</p> <ul style="list-style-type: none"> <li>• have either clinical or radiological evidence of pneumonia</li> </ul> <p>or</p> <ul style="list-style-type: none"> <li>• acute respiratory distress syndrome</li> </ul> <p>or</p> <ul style="list-style-type: none"> <li>• influenza like illness (fever <math>\geq 37.8^{\circ}\text{C}</math> and at least one of the following respiratory symptoms, which must be of acute onset: persistent cough (with or without sputum), hoarseness, nasal discharge or congestion, shortness of breath, sore throat, wheezing, sneezing)</li> </ul> <p>Note: Clinicians should consider testing inpatients with new respiratory symptoms or fever without another cause or worsening of a pre-existing respiratory condition.</p> <p>2.2 Patients who meet the following criteria and are well enough to remain in the community</p> <ul style="list-style-type: none"> <li>• new continuous cough and/or</li> <li>• high temperature</li> </ul> <p>Individuals with cough or fever should now stay at home.<br/>Clinicians should be alert to the possibility of atypical presentations in patients who are immunocompromised.<br/>Alternative clinical diagnoses and epidemiological risk factors should be considered.</p> | <p>--</p>                                                                                                                                                                                                                                                                                                                                                                                                                                                                                                                                                                                                                                                                                                                                                                                                                                           | <p>18/3/20</p> |
| <p>As above, only change is " Those staying at home are not prioritised for testing."</p>                                                                                                                                                                                                                                                                                                                                                                                                                                                                                                                                                                                                                                                                                                                                                                                                                                                                                                                                                                                                                                                                                                                                                                                                                                                                                                                                                                                                                                                                                                                                                                    | <p>1. Prioritisation<br/>Group 1 (test first): patient requiring critical care for the management of pneumonia, acute respiratory distress syndrome (ARDS) or influenza like illness (ILI)<sup>†</sup>, or an alternative indication of severe illness has been provided, for example severe pneumonia or ARDS<br/>Group 2: all other patients requiring admission to hospital* for management of pneumonia, ARDS or ILI<br/>Group 3: clusters of disease in residential or care settings, for example long term care facilities and prisons (usually samples from 5 cases are sufficient in these settings)<br/><sup>†</sup> ILI: fever <math>\geq 37.8^{\circ}\text{C}</math> and at least one of the following respiratory symptoms, which must be of acute onset: persistent cough (with or without sputum), hoarseness, nasal discharge or</p> | <p>27/3/20</p> |

|                                                                        |                                                                                                                                                                                                                                                    |         |
|------------------------------------------------------------------------|----------------------------------------------------------------------------------------------------------------------------------------------------------------------------------------------------------------------------------------------------|---------|
|                                                                        | congestion, shortness of breath, sore throat, wheezing, sneezing)<br>*admission to hospital: a hospital practitioner has decided that admission to hospital is required with an expectation that the patient will need to stay at least one night. |         |
| " Those staying at home are not prioritised for testing." text removed | unchanged                                                                                                                                                                                                                                          | 7/4/20  |
| Unchanged                                                              | Removed priorities for testing                                                                                                                                                                                                                     | 21/4/20 |

## Research

- 1 Dunning JW, Merson L, Rohde GGU, *et al.* Open source clinical science for emerging infections. *Lancet Infect. Dis.* 2014;**14**:8–9. doi:10.1016/S1473-3099(13)70327-X
- 2 Pardinaz-Solis R, Longuere K-S, Moore S, *et al.* ISARIC – enhancing the clinical research response to epidemics. *Int J Infect Dis* 2016;**53**:137. doi:10.1016/j.ijid.2016.11.338
