# Supplementary material for: Features of 20 133 UK patients in hospital with covid-19 using the ISARIC WHO Clinical Characterisation Protocol: prospective observational cohort study
Source: PubMed Central journal article supplement (PMC7243036; doi:10.1136/bmj.m1985), 2020-05-22
Supplement: doca057402.ww3.pdf [file doca057402.ww3.pdf]

# ISARIC/WHO Clinical Characterisation Protocol for Severe Emerging Infections (UK)

## SARI Case Report Form

## FRONT PAGE 2 of 2

### GENERAL GUIDANCE

- The CRF is designed to collect data obtained through examination, interview and review of hospital notes. Data may be collected retrospectively if the patient is enrolled after the admission date.
- Participant Identification Numbers consist of a 5-digit CPMS site code and a 4 digit participant number. You can obtain a site code by contacting your local R&D office or [CCP@liverpool.ac.uk](mailto:CCP@liverpool.ac.uk) . Participant numbers should be assigned sequentially for each site beginning with 0001. In the case of a single site recruiting participants on different wards, or where it is otherwise difficult to assign sequential numbers, it is acceptable to assign numbers in blocks or incorporating alpha characters. E.g. Ward X will assign numbers from 0001 or A001 onwards and Ward Y will assign numbers from 5001 or B001 onwards. Enter the Participant Identification Number at the top of every page.
- Case Report Form Data should be entered to the central database at <https://ncov.medsci.ox.ac.uk>
- REDCap registration access is obtained by contacting [ncov@isaric.org](mailto:ncov@isaric.org) please state “[CCP-UK REDCap ACCESS]” in the title
- Please contact us at [ncov@isaric.org](mailto:ncov@isaric.org) we can help with database problems
- In the case of a participant transferring between study sites, it is preferred to maintain the same Participant Identification Number across the sites. When this is not possible, space for recording the new number is provided.
- Complete every line of every section, except for where the instructions say to skip a section based on certain responses.
- Selections with square boxes () are single selection answers (choose one answer only). Selections with circles () are multiple selection answers (choose as many answers as are applicable).
- Mark ‘N/A’ for any results of laboratory values that are not available, not applicable or unknown.
- Avoid recording data outside of the dedicated areas. Sections are available for recording additional information.
- We recommend writing clearly in black ink, using BLOCK-CAPITAL LETTERS.
- Place an (X) when you choose the corresponding answer. To make corrections, strike through (-----) the data you wish to delete and write the correct data above it. Please initial and date all corrections.
- Please keep all of the sheets for a single participant together e.g. with a staple or participant-unique folder.
- DO NOT SEND CRFs to anyone by email or post.
- These two FRONT PAGES do not need to be retained.

**ISARIC/WHO Clinical Characterisation Protocol for Severe Emerging Infections****SARI Case Report Form****CORE CASE RECORD FORM**

page 1 of 3

Date of enrolment [\_\_] [\_\_] / [\_\_] [\_\_] / [2\_] [0\_] [Y\_] [Y\_] Site Location \_\_\_\_\_

**CLINICAL INCLUSION CRITERIA**Proven or high likelihood of infection with pathogen of Public Health Interest  YES  NO

Experience of the following symptoms during this illness episode: (one or more required for inclusion)

A history of self-reported feverishness or measured fever of  $\geq 38^{\circ}\text{C}$ :  YES  NOCough:  YES  NODyspnoea (shortness of breath) OR Tachypnoea\*:  YES  NOClinical suspicion of ARI despite not meeting criteria above:  YES  NO*\* respiratory rate  $\geq 50$  breaths/min for <1 year;  $\geq 40$  breaths/min for 1-4 years;  $\geq 30$  breaths/min for 5-12 years;  $\geq 20$  breaths/min for  $\geq 13$  years***EPIDEMIOLOGICAL FACTORS**

In the 14 days before onset of illness had any of the following:

**A history of travel to an area with documented cases of infection of a respiratory pathogen of public health interest in the context of an outbreak, suspected outbreak or incident of a respiratory pathogen of public health interest** YES  NO  Not known**Close contact\* with a confirmed or probable case of infection with the respiratory pathogen of public health interest, while that patient was symptomatic** YES  NO  Not known**Presence in a healthcare facility where infections caused by the respiratory pathogen of public health interest have been managed** YES  NO  Not known**Presence in a laboratory handling samples suspected or confirmed of having the respiratory pathogen of public health interest present** YES  NO  Not known**An otherwise unexplained respiratory illness in the context of an outbreak, suspected outbreak or incident of a respiratory pathogen of public health interest** YES  NO  Not known**Direct contact with animals in countries where the pathogen of public health interest is known to be circulating in animal populations or where human infections have occurred as a result of presumed zoonotic transmission** YES  NO  Not known

\* Close contact' is defined as:

- Health care associated exposure, including providing direct care for patients, e.g. health care worker, direct exposure to body fluids or specimens including aerosols, working with health care workers infected with the pathogen of public health interest, visiting patients or staying in the same close environment of relevant case.
- Working together in close proximity or sharing the same classroom environment with a relevant case
- Traveling together with in any kind of conveyance with a relevant case
- Living in the same household as a relevant case

## CORE CASE RECORD FORM

Page 2 of 3

## DEMOGRAPHICS

Sex at Birth:  Male  Female  Not specified \*Date of birth [ \_ ] [ \_ ] / [ \_ ] [ \_ ] / [ \_ ] [ \_ ] [ \_ ] [ \_ ]

\* WHERE DATA IS BEING COLLECTED WITHOUT CONSENT FOR TIER ZERO, ONLY RECORD AGE AND NOT DATE OF BIRTH

If date of birth is unknown or for Tier Zero, record Age [ \_ ] [ \_ ] [ \_ ] years OR [ \_ ] [ \_ ] months

Ethnic group (check all that apply):

 Arab  Black  East Asian  South Asian  West Asian  Latin American  White  Aboriginal/First NationsOther: \_\_\_\_\_  N/AEmployed as a Healthcare Worker?  YES  NO  N/AEmployed in a Microbiology laboratory?  YES  NO  N/APregnant?  YES  NO  Unknown  N/A If YES: Gestational weeks assessment: [ \_ ] [ \_ ] weeksPOST PARTUM (within six weeks of delivery)?  YES  NO or N/A (skip this section - go to INFANT)Pregnancy Outcome:  Live birth  Still birth Delivery date: [ \_ ] [ \_ ] / [ \_ ] [ \_ ] / [ 2 ] [ 0 ] [ \_ ] [ \_ ]Baby tested for Mother's ARI infection?  YES  NO  N/A If YES:  Positive  Negative Method:  PCR  Other: \_\_\_\_\_INFANT – Less than 1 year old?  YES  NO (skip this section) Birth weight: [ \_ ] [ \_ ] . [ \_ ] [ \_ ] kg or [ \_ ] [ \_ ] lbs  N/AGestational:  Term birth ( $\geq 37$ wk GA)  Preterm birth ( $< 37$ wk GA) if  $< 37$ wk Estimated gestation \_\_\_\_\_ weeks  N/ABreastfed?  YES  NO  N/A If YES:  Currently breastfed Breastfeeding discontinued at [ \_ ] [ \_ ] weeks  N/AAppropriate development for age?  YES  NO  N/AVaccinations appropriate for age/country?  YES  NO  Unknown  N/A

## ONSET AND ADMISSION

Symptom onset date of first/earliest symptom: [ \_ ] [ \_ ] / [ \_ ] [ \_ ] / [ 2 ] [ 0 ] [ \_ ] [ \_ ]

Admission date at this facility: [ \_ ] [ \_ ] / [ \_ ] [ \_ ] / [ 2 ] [ 0 ] [ \_ ] [ \_ ]

Time of admission (24-hour format): [ \_ ] [ \_ ] / [ \_ ] [ \_ ]

Transfer from other facility?  YES-facility is a study site  YES-facility is not a study site  NO  N/AIf YES: Name of transfer facility: \_\_\_\_\_  N/AIf YES: Admission date at transfer facility (DD/MM/YYYY): [ \_ ] [ \_ ] / [ \_ ] [ \_ ] / [ 2 ] [ 0 ] [ \_ ] [ \_ ]  N/AIf YES-Study Site: Participant ID # at transfer facility:  Same as above Different: [ \_ ] [ \_ ] [ \_ ] - [ \_ ] [ \_ ] [ \_ ] [ \_ ]  N/ATravel in the 14 days prior to first symptom onset?  YES  NO  N/A If YES, complete the

If YES, state location(s) &amp; date(s): Country: \_\_\_\_\_ City/Geographic area: \_\_\_\_\_

Return Date: [ \_ ] [ \_ ] / [ \_ ] [ \_ ] / [ 2 ] [ 0 ] [ \_ ] [ \_ ]  N/A (if more use TRAVEL EXPOSURE CRF)

Contact with animals, raw meat or insect bites in the 14 days prior to symptom onset?

 YES  NO  Unknown  N/A If YES, complete the ANIMAL EXPOSURE CRF





## CORE CASE RECORD FORM

Page 2 of 3

**ADMISSION AND DAILY TREATMENT** (complete every line):**DATE OF ASSESSMENT** (DD/MM/YYYY): [ \_ ] [ \_ ] / [ \_ ] [ \_ ] / [ \_ 2 ] [ \_ 0 ] [ \_ Y ] [ \_ Y ]

Record the worst value between 00:00 to 24:00 on day of assessment (if Not Available write 'N/A'):

Current admission to ICU/ITU/IMC/HDU?  YES  NO  N/A**Done**  YES  NO  $FiO_2$  (0.21-1.0) [ \_ ] [ \_ ] [ \_ ] or [ \_ ] [ \_ ] L/min**Done**  YES  NO  $SaO_2$  [ \_ ] [ \_ ] [ \_ ] %**Done**  YES  NO  $PaO_2$  at time of  $FiO_2$  above [ \_ ] [ \_ ] [ \_ ] kPa or  mmHg**Done**  YES  NO  $PaO_2$  sample type:  Arterial  Venous  Capillary  N/A**Done**  YES  NO From same blood gas record as  $PaO_2$   $PCO_2$  \_\_\_\_\_  kPa or  mmHg**Done**  YES  NO pH \_\_\_\_\_**Done**  YES  NO  $HCO_3^-$  \_\_\_\_\_ mEq/L**Done**  YES  NO Base excess \_\_\_\_\_ mmol/L**Done**  YES  NO AVPU Alert [ \_ ] Verbal [ \_ ] Pain [ \_ ] Unresponsive [ \_ ] Glasgow Coma Score (GCS / 15) [ \_ ] [ \_ ]**Done**  YES  NO Systolic Blood Pressure [ \_ ] [ \_ ] [ \_ ] mmHg**Done**  YES  NO Diastolic Blood Pressure [ \_ ] [ \_ ] [ \_ ] mmHg**Done**  YES  NO Mean Arterial Blood Pressure [ \_ ] [ \_ ] [ \_ ] mmHg**Done**  YES  NO Urine flow rate [ \_ ] [ \_ ] [ \_ ] [ \_ ] [ \_ ] mL/24 hours  Check if estimated

Is the patient currently receiving, or has received (from 00:00 to 24:00) on day of assessment) (apply to all questions in this section)

**Non-invasive ventilation** (e.g. BIPAP, CPAP)?  YES  NO  N/A **Invasive ventilation?**  YES  NO  N/A**High-flow nasal canula oxygen therapy?**  YES  NO  N/A **ECLS/ECMO?**  YES  NO  N/A**Dialysis/Hemofiltration?**  YES  NO  N/A**Any vasopressor/inotropic support?**  YES  NO (if NO, answer the next 3 questions NO)  N/ADopamine <5µg/kg/min OR Dobutamine OR milrinone OR levosimendan:  YES  NODopamine 5-15µg/kg/min OR Epinephrine/Norepinephrine < 0.1µg/kg/min OR vasopressin OR phenylephrine:  YES  NODopamine >15µg/k/min OR Epinephrine/Norepinephrine > 0.1µg/kg/min:  YES  NO**Neuromuscular blocking agents?**  YES  NO  N/A **Inhaled Nitric Oxide?**  YES  NO  N/A**Prone positioning?**  YES  NO  N/A **Tracheostomy inserted?**  YES  NO  N/A**Other intervention or procedure:**  YES  NO  N/A If YES, Specify: \_\_\_\_\_

## DAILY CASE RECORD FORM

Page 3 of 3

## DAILY LABORATORY RESULTS

(DD/MM/YYYY): [\_\_][\_\_]/[\_\_][\_\_]/[2][0][\_\_][\_\_]

Record the worst value between 00:00 to 24:00 on day of assessment (if Not Available write 'N/A'):

Done  YES  NO Haemoglobin \_\_\_\_\_  g/L or  g/dLDone  YES  NO WBC count \_\_\_\_\_  x10<sup>9</sup>/L or  x10<sup>3</sup>/μLDone  YES  NO Lymphocyte count \_\_\_\_\_  cells/ μLDone  YES  NO Neutrophil count \_\_\_\_\_  cells/ μLDone  YES  NO Haematocrit [\_\_][\_\_]%Done  YES  NO Platelets \_\_\_\_\_  x10<sup>9</sup>/L or  x10<sup>3</sup>/μL Done  YES  NO APTT/APTR \_\_\_\_\_Done  YES  NO PT \_\_\_\_\_ seconds or Done  YES  NO INR \_\_\_\_\_Done  YES  NO ALT/SGPT \_\_\_\_\_ U/L Done  YES  NO Total Bilirubin \_\_\_\_\_  μmol/L or  mg/dLDone  YES  NO AST/SGOT \_\_\_\_\_ U/L Done  YES  NO Glucose \_\_\_\_\_  mmol/L or  mg/dLDone  YES  NO Blood Urea Nitrogen (urea) \_\_\_\_\_  mmol/L or  mg/dLDone  YES  NO Lactate \_\_\_\_\_  mmol/L or  mg/dLDone  YES  NO LDH [\_\_][\_\_][\_\_].[\_\_] U/LDone  YES  NO Creatinine Kinase (CPK) [\_\_][\_\_][\_\_].[\_\_] U/LDone  YES  NO Creatinine \_\_\_\_\_  μmol/L or  mg/dLDone  YES  NO Sodium [\_\_][\_\_][\_\_][\_\_] mEq/LDone  YES  NO Potassium [\_\_][\_\_].[\_\_] mEq/LDone  YES  NO Procalcitonin [\_\_][\_\_].[\_\_][\_\_] ng/mLDone  YES  NO CRP [\_\_][\_\_][\_\_].[\_\_] mg/LChest X-Ray /CT performed?  YES  NO  N/AIF Yes: Were infiltrates present?  YES  NO  N/A







**OUTCOME CASE RECORD FORM****TREATMENT: At ANY time during hospitalisation, did the patient receive/undergo:**ICU or High Dependency Unit admission?  YES  NO  N/A..... If YES, total duration: \_\_\_\_\_ daysDate of ICU admission: [D\_][D\_]/[M\_][M\_]/[2\_][0\_][Y\_][Y\_]  N/AICU discharge date: [D\_][D\_]/[M\_][M\_]/[2\_][0\_][Y\_][Y\_]  N/AOxygen therapy?  YES  NO  N/ANon-invasive ventilation? (e.g. BIPAP, CPAP)  YES  NO  N/AInvasive ventilation (Any)?  YES  NO  N/A If YES, total duration: \_\_\_\_\_ daysProne Ventilation?  YES  NO  N/AInhaled Nitric Oxide?  YES  NO  N/ATracheostomy inserted?  YES  NO  N/AExtracorporeal (ECMO) support?  YES  NO  N/A If YES, total duration: \_\_\_\_\_ daysRenal replacement therapy (RRT) or dialysis?  YES  NO  N/AInotropes/vasopressors?  YES  NO  N/A If YES, total duration: \_\_\_\_\_ days

OTHER intervention or procedure (please specify): \_\_\_\_\_

**OUTCOME CASE RECORD FORM**

| <b>COMPLICATIONS: At any time during hospitalisation did the patient experience:</b> |                                                                                       |                                                               |                                                                                       |
|--------------------------------------------------------------------------------------|---------------------------------------------------------------------------------------|---------------------------------------------------------------|---------------------------------------------------------------------------------------|
| Viral pneumonia                                                                      | <input type="checkbox"/> YES <input type="checkbox"/> NO <input type="checkbox"/> N/A | Cardiac arrest                                                | <input type="checkbox"/> YES <input type="checkbox"/> NO <input type="checkbox"/> N/A |
| Bacterial pneumonia                                                                  | <input type="checkbox"/> YES <input type="checkbox"/> NO <input type="checkbox"/> N/A | Bacteraemia                                                   | <input type="checkbox"/> YES <input type="checkbox"/> NO <input type="checkbox"/> N/A |
| Acute Respiratory Distress Syndrome                                                  | <input type="checkbox"/> YES <input type="checkbox"/> NO <input type="checkbox"/> N/A | Coagulation disorder / Disseminated Intravascular Coagulation | <input type="checkbox"/> YES <input type="checkbox"/> NO <input type="checkbox"/> N/A |
| Cryptogenic organizing pneumonia (COP)                                               | <input type="checkbox"/> YES <input type="checkbox"/> NO <input type="checkbox"/> N/A | Anaemia                                                       | <input type="checkbox"/> YES <input type="checkbox"/> NO <input type="checkbox"/> N/A |
| Pneumothorax                                                                         | <input type="checkbox"/> YES <input type="checkbox"/> NO <input type="checkbox"/> N/A | Rhabdomyolysis / Myositis                                     | <input type="checkbox"/> YES <input type="checkbox"/> NO <input type="checkbox"/> N/A |
| Pleural effusion                                                                     | <input type="checkbox"/> YES <input type="checkbox"/> NO <input type="checkbox"/> N/A | Acute renal injury/acute renal failure                        | <input type="checkbox"/> YES <input type="checkbox"/> NO <input type="checkbox"/> N/A |
| Bronchiolitis                                                                        | <input type="checkbox"/> YES <input type="checkbox"/> NO <input type="checkbox"/> N/A | Gastrointestinal haemorrhage                                  | <input type="checkbox"/> YES <input type="checkbox"/> NO <input type="checkbox"/> N/A |
| Meningitis / Encephalitis                                                            | <input type="checkbox"/> YES <input type="checkbox"/> NO <input type="checkbox"/> N/A | Pancreatitis                                                  | <input type="checkbox"/> YES <input type="checkbox"/> NO <input type="checkbox"/> N/A |
| Seizure                                                                              | <input type="checkbox"/> YES <input type="checkbox"/> NO <input type="checkbox"/> N/A | Liver dysfunction                                             | <input type="checkbox"/> YES <input type="checkbox"/> NO <input type="checkbox"/> N/A |
| Stroke / Cerebrovascular accident                                                    | <input type="checkbox"/> YES <input type="checkbox"/> NO <input type="checkbox"/> N/A | Hyperglycaemia                                                | <input type="checkbox"/> YES <input type="checkbox"/> NO <input type="checkbox"/> N/A |
| Congestive heart failure                                                             | <input type="checkbox"/> YES <input type="checkbox"/> NO <input type="checkbox"/> N/A | Hypoglycaemia                                                 | <input type="checkbox"/> YES <input type="checkbox"/> NO <input type="checkbox"/> N/A |
| Endocarditis/Myocarditis/Pericarditis                                                | <input type="checkbox"/> YES <input type="checkbox"/> NO <input type="checkbox"/> N/A | Other                                                         | <input type="checkbox"/> YES <input type="checkbox"/> NO <input type="checkbox"/> N/A |
| Cardiac arrhythmia                                                                   | <input type="checkbox"/> YES <input type="checkbox"/> NO <input type="checkbox"/> N/A | If yes, specify: _____<br>_____                               |                                                                                       |
| Cardiac ischemia                                                                     | <input type="checkbox"/> YES <input type="checkbox"/> NO <input type="checkbox"/> N/A |                                                               |                                                                                       |

**STUDY PARTICIPATION**

Is / Has the participant being recruited to a trial or multi-centre study during the period of their current illness (including initiation in the community and hospital)?  YES  NO

IF YES , specify

Name of study \_\_\_\_\_

Study Participant ID \_\_\_\_\_

Add another study?  YES  NO

IF YES , specify

Name of study \_\_\_\_\_

Study Participant ID \_\_\_\_\_

Add another study?  YES  NO

IF YES , specify

Name of study \_\_\_\_\_

Study Participant ID \_\_\_\_\_

## OUTCOME CASE RECORD FORM

| OUTCOME                                                                                                                                                                                                                                                                                                                                                                                                                                                                                                                                                                                                                                                                                                                                                                                                                                                                                                                                                                                                                                                                                                                                                                                                                                                                                                                                                                                                                                                                                                                                                                                                                                                                                                                                                                                                                                                                                                                                                                               |
|---------------------------------------------------------------------------------------------------------------------------------------------------------------------------------------------------------------------------------------------------------------------------------------------------------------------------------------------------------------------------------------------------------------------------------------------------------------------------------------------------------------------------------------------------------------------------------------------------------------------------------------------------------------------------------------------------------------------------------------------------------------------------------------------------------------------------------------------------------------------------------------------------------------------------------------------------------------------------------------------------------------------------------------------------------------------------------------------------------------------------------------------------------------------------------------------------------------------------------------------------------------------------------------------------------------------------------------------------------------------------------------------------------------------------------------------------------------------------------------------------------------------------------------------------------------------------------------------------------------------------------------------------------------------------------------------------------------------------------------------------------------------------------------------------------------------------------------------------------------------------------------------------------------------------------------------------------------------------------------|
| <p><b>Outcome:</b> <input type="checkbox"/> Discharged alive expected to survive <input type="checkbox"/> Hospitalization <input type="checkbox"/> Transfer to other facility <input type="checkbox"/> Death<br/> <input type="checkbox"/> Palliative discharge <input type="checkbox"/> Unknown</p> <p><b>Outcome date:</b> [<u>  </u>][<u>  </u>]/[<u>  </u>][<u>  </u>]/[<u>  </u>][<u>  </u>][<u>  </u>][<u>  </u>] <input type="checkbox"/> N/A</p> <p><b>If Discharged alive:</b></p> <p style="margin-left: 20px;"><b>Ability to self-care at discharge versus before illness:</b> <input type="checkbox"/> Same as before illness <input type="checkbox"/> Worse <input type="checkbox"/> Better <input type="checkbox"/> N/A</p> <p style="margin-left: 20px;"><b>If Discharged alive: Post-discharge treatment:</b></p> <p style="margin-left: 40px;"><b>Oxygen therapy?</b> <input type="checkbox"/> YES <input type="checkbox"/> NO <input type="checkbox"/> N/A    <b>Dialysis/renal treatment?</b> <input type="checkbox"/> YES <input type="checkbox"/> NO <input type="checkbox"/> N/A</p> <p style="margin-left: 40px;"><b>Other intervention or procedure?</b> <input type="checkbox"/> YES <input type="checkbox"/> NO <input type="checkbox"/> N/A</p> <p style="margin-left: 40px;"><b>If YES: Specify (multiple permitted):</b> _____</p> <p style="margin-left: 20px;"><b>If Transferred: Facility name:</b> _____ <input type="checkbox"/> N/A</p> <p style="margin-left: 20px;"><b>If Transferred: Is the transfer facility a study site?</b> <input type="checkbox"/> YES <input type="checkbox"/> NO <input type="checkbox"/> N/A</p> <p style="margin-left: 20px;"><b>If a Study Site: Participant ID # at new facility:</b> <input type="checkbox"/> Same as above</p> <p style="margin-left: 20px;"><input type="checkbox"/> Different: [<u>  </u>][<u>  </u>][<u>  </u>]-[<u>  </u>][<u>  </u>][<u>  </u>][<u>  </u>] <input type="checkbox"/> N/A</p> |
